# Supplementary material
Source: PubMed Central journal article supplement (PMC7385554)
Supplement: NIHMS1607431-supplement-1.pdf [file NIHMS1607431-supplement-1.pdf]

1 TABLE S1. Baseline Characteristics by Weekly Amount of Resistance Exercise

| Baseline Characteristics                            | Weekly Amount of Resistance Exercise (minutes/week) |                 |                    |                   |
|-----------------------------------------------------|-----------------------------------------------------|-----------------|--------------------|-------------------|
|                                                     | 0<br>(n=9,153)                                      | 1-59<br>(n=810) | 60-119<br>(n=1302) | ≥120<br>(n=1,326) |
| Female                                              | 1,891 (20.7)                                        | 134 (16.5)      | 285 (21.9)         | 300 (22.6)        |
| Age (year)                                          | 47.0 ± 9.7                                          | 45.8 ± 8.4      | 46.1 ± 8.8         | 44.2 ± 9.6        |
| Heavy alcohol drinker <sup>a</sup>                  | 1,082 (11.8)                                        | 94 (11.6)       | 174 (13.4)         | 148 (11.2)        |
| Current smoker                                      | 1,101 (12)                                          | 78 (9.6)        | 120 (9.2)          | 143 (10.8)        |
| Parental CVD                                        | 2,451 (26.8)                                        | 201 (24.8)      | 310 (23.8)         | 325 (24.5)        |
| Meeting aerobic exercise<br>guidelines <sup>b</sup> | 4,589 (50.1)                                        | 648 (80)        | 1,081 (83)         | 1,058 (79.8)      |
| Body mass index (kg/m <sup>2</sup> ) <sup>c</sup>   | 26.3 ± 4.2                                          | 25.3 ± 3.4      | 25.3 ± 3.6         | 25.4 ± 3.7        |
| Hypertension <sup>d</sup>                           | 2,723 (29.7)                                        | 211 (26)        | 311 (23.9)         | 321 (24.2)        |
| Diabetes <sup>e</sup>                               | 398 (4.3)                                           | 30 (3.7)        | 45 (3.5)           | 35 (2.6)          |
| Hypercholesterolemia <sup>f</sup>                   | 2,986 (32.6)                                        | 233 (28.8)      | 331 (25.4)         | 301 (22.7)        |

2 Values are number (%) or mean ± SD.

3 <sup>a</sup> Defined as alcohol drinks >14 and >7 per week for men and women, respectively.

- 1 <sup>b</sup> Defined as aerobic exercise  $\geq 500$  MET-minutes per week.
- 2 <sup>c</sup> Calculated as the weight in kilograms divided by the square of the height in meters.
- 3 <sup>d</sup> Defined as systolic blood pressure  $\geq 140$  mmHg, diastolic blood pressure  $\geq 90$  mmHg, or previous diagnosis by a physician.
- 4 <sup>e</sup> Defined as fasting glucose  $\geq 126$  mg/dl, previous diagnosis by a physician, or insulin use.
- 5 <sup>f</sup> Defined as total cholesterol  $\geq 240$  mg/dl, or previous diagnosis by a physician.
- 6 CVD, cardiovascular disease; SD, standard deviation.

1 TABLE S2. Hazard Ratio (95% CI) of Total CVD Events, CVD Morbidity, and All-Cause Mortality by Resistance Exercise for  
 2 Participants Meeting and not Meeting Recommended Aerobic Exercise

|                                                      | Total CVD Events    |                     | CVD Morbidity       |                     | All-Cause Mortality |                     |
|------------------------------------------------------|---------------------|---------------------|---------------------|---------------------|---------------------|---------------------|
| Meeting                                              | Y <sup>b</sup>      | N <sup>c</sup>      | Y <sup>b</sup>      | N <sup>c</sup>      | Y <sup>b</sup>      | N <sup>c</sup>      |
| Recommended                                          | AE <sup>a</sup>     |                     |                     |                     |                     |                     |
| Weekly Frequency of Resistance Exercise (times/week) |                     |                     |                     |                     |                     |                     |
| 0                                                    | 1.00<br>(Reference) | 1.00<br>(Reference) | 1.00<br>(Reference) | 1.00<br>(Reference) | 1.00<br>(Reference) | 1.00<br>(Reference) |
| 1                                                    | 0.25<br>(0.14-0.46) | 0.35<br>(0.16-0.77) | 0.36<br>(0.17-0.77) | 0.31<br>(0.11-0.87) | 0.49<br>(0.29-0.80) | 1.08<br>(0.58-2.01) |
| 2                                                    | 0.41<br>(0.24-0.71) | 0.52<br>(0.26-1.06) | 0.66<br>(0.35-1.23) | 0.39<br>(0.14-1.10) | 0.53<br>(0.32-0.87) | 0.99<br>(0.52-1.88) |
| 3                                                    | 0.62<br>(0.35-1.11) | 0.34<br>(0.08-1.41) | 0.83<br>(0.41-1.70) | 0.47<br>(0.11-1.98) | 0.54<br>(0.30-0.96) | 1.14<br>(0.41-3.15) |
| ≥4                                                   | 1.60                | 0.61                | 1.83                | 0.94                | 1.33                | 0.00                |

|                                                      |                     |                     |                     |                     |                     |                     |
|------------------------------------------------------|---------------------|---------------------|---------------------|---------------------|---------------------|---------------------|
|                                                      | (0.86-2.97)         | (0.08-4.48)         | (0.83-4.03)         | (0.13-6.93)         | (0.77-2.29)         | (0.00-Inf)          |
| p-value for Linear Trend:                            |                     |                     |                     |                     |                     |                     |
|                                                      | 0.39                | 0.03                | 0.23                | 0.08                | 0.90                | 0.94                |
| p-value for Quadratic Trend:                         |                     |                     |                     |                     |                     |                     |
|                                                      | <0.001              | 0.052               | 0.006               | 0.01                | <0.001              | 0.41                |
| p-value for Interaction                              |                     |                     |                     |                     |                     |                     |
|                                                      | 0.65                |                     |                     | 0.90                |                     | 0.06                |
| Weekly Minutes of Resistance Exercise (minutes/week) |                     |                     |                     |                     |                     |                     |
| 0                                                    | 1.00<br>(Reference) | 1.00<br>(Reference) | 1.00<br>(Reference) | 1.00<br>(Reference) | 1.00<br>(Reference) | 1.00<br>(Reference) |
| 1-59                                                 | 0.40<br>(0.21-0.52) | 0.41<br>(0.23-0.74) | 0.55<br>(0.32-0.94) | 0.34<br>(0.15-0.76) | 0.47<br>(0.32-0.69) | 1.11<br>(0.69-1.79) |
| 60-119                                               | 0.74<br>(0.43-1.26) | 0.26<br>(0.06-1.08) | 0.85<br>(0.43-1.66) | 0.35<br>(0.08-1.47) | 0.84<br>(0.51-1.38) | 0.47<br>(0.11-1.92) |
| ≥120                                                 | 0.94<br>(0.47-1.89) | 1.02<br>(0.32-3.28) | 1.06<br>(0.43-2.59) | 0.93<br>(0.22-3.91) | 0.97<br>(0.53-1.77) | 0.94<br>(0.23-3.87) |

p-value for Linear Trend:

0.69                      0.89                      0.40                      0.69                      0.50                      0.97

p-value for Quadratic Trend:

0.72                      <0.001                      0.86                      0.03                      0.69                      0.58

p-value for Interaction

0.48                                              0.65                                              0.04

---

1 <sup>a</sup> Defined as baseline physical activity  $\geq 500$  MET-minutes/week.

2 <sup>b</sup> Model was adjusted for baseline examination year, age (year), gender, smoking status (current smoker or not), alcohol consumption  
3 (heavy drinker or not), parental history of cardiovascular disease (yes or no), body mass index ( $\text{kg}/\text{m}^2$ ), hypertension (yes or no), diabetes  
4 (yes or no), and hypercholesterolemia (yes or no) among the group meeting the recommended aerobic exercise.

5 <sup>c</sup> Model was adjusted for baseline examination year, age (year), gender, smoking status (current smoker or not), alcohol consumption  
6 (heavy drinker or not), parental history of cardiovascular disease (yes or no), body mass index ( $\text{kg}/\text{m}^2$ ), hypertension (yes or no), diabetes  
7 (yes or no), and hypercholesterolemia (yes or no) among the group not meeting the recommended aerobic exercise.

8 AE, aerobic exercise; CI, confidence interval; CVD, cardiovascular diseases; HR, hazard ratio.
